# Supplementary material for: The daughter–parent plot: a tool for analyzing thermochronological data
Source: Copernicus journal article supplement (doi:10.5194/gchron-6-429-2024), 2024-07-26
Supplement: Supplementary file 1 [file Table S1_Haertel_Enkelmann.xlsx]

## Sheet: Sheet1
Table S1. Synthetic data for daughter-parent relationships in Figure 1. P: Parent concentration; D: Daughter concentration; unc.: uncertainty.
P	P unc.	D	D unc.	label
1	1.41815	2	2.49085	proportional
2	1.4342	4	2.92989	proportional
3	1.82036	6	1.34155	proportional
4	1.67517	8	2.19749	proportional
5	1.42176	10	1.32928	proportional
6	1.08442	12	2.06994	proportional
7	1.428	14	2.77117	proportional
8	1.37968	16	2.07632	proportional
9	1.91609	18	1.25834	proportional
10	1.54083	20	1.16035	proportional
11	1.74863	22	2.22215	proportional
12	1.98347	24	2.13668	proportional
4.93771	1.86878	13.8135	2.82993	cluster
7.33321	1.42003	14.1922	2.20596	cluster
7.48586	1.26909	10.8946	2.98083	cluster
4.90524	1.76178	11.574	1.15615	cluster
4.1944	1.56601	11.3999	2.30535	cluster
5.90699	1.00525	13.635	1.9161	cluster
6.56864	1.63705	11.5076	2.14585	cluster
7.03484	1.61972	9.23953	2.9262	cluster
6.50279	1.23983	10.173	2.21824	cluster
7.02635	1.18075	12.7457	2.39485	cluster
4.9434	1.18052	11.7778	1.02147	cluster
6.52099	1.25598	10.4289	1.95364	cluster
2.26462	1.79465	4.9245	2.6328	linear, zero intercept
1.81447	1.49996	4.83271	1.55998	linear, zero intercept
1.68413	1.55712	3.92479	1.66068	linear, zero intercept
3.89906	1.6775	6.2949	1.72363	linear, zero intercept
4.84194	1.90546	7.03462	1.78491	linear, zero intercept
3.84153	1.97368	11.1003	1.00796	linear, zero intercept
4.96179	1.06934	8.51424	2.75265	linear, zero intercept
8.20107	1.74471	13.1909	1.45882	linear, zero intercept
8.02476	1.24339	16.16	2.25783	linear, zero intercept
10.8414	1.38356	17.3702	1.7955	linear, zero intercept
10.8875	1.54881	17.9094	1.48688	linear, zero intercept
10.4531	1.16664	24.0035	2.85209	linear, zero intercept
1	1.63064	4.2245	1.29638	linear, systematic offset
2	1.89031	5.449	1.33233	linear, systematic offset
3	1.62886	6.6735	1.79536	linear, systematic offset
4	1.28666	7.898	1.80449	linear, systematic offset
5	1.43251	9.1225	2.80926	linear, systematic offset
6	1.78337	10.347	2.84809	linear, systematic offset
7	1.48567	11.5715	1.26661	linear, systematic offset
8	1.33974	12.796	2.32314	linear, systematic offset
9	1.547	14.0205	2.49079	linear, systematic offset
10	1.91603	15.245	2.50128	linear, systematic offset
11	1.08847	16.4695	1.57003	linear, systematic offset
12	1.60564	17.694	1.89362	linear, systematic offset
1	1.26187	3.8083	1.29346	several populations
2.4	1.64604	7.84894	1.64275	several populations
3.8	1.98503	13.2523	1.41294	several populations
5.2	1.57472	16.8932	1.11014	several populations
6.6	1.83938	19.5084	2.38716	several populations
8	1.21296	23.2532	2.4387	several populations
1	1.03643	0.790359	2.64256	several populations
3.6	1.20158	2.3	1.58114	several populations
6.2	1.72239	4.55583	2.0125	several populations
8.8	1.99441	6.49643	2.59868	several populations
11.4	1.52078	7.97467	1.72485	several populations
14	1.21137	9.96263	1.32021	several populations
0.764834	1.12607	2.54396	1.30532	non-linear
2.09508	1.32599	7.12081	1.36406	non-linear
3.68458	1.35026	7.35246	2.50113	non-linear
3.71917	1.71241	9.29128	1.75911	non-linear
4.38708	1.93106	8.92315	2.21247	non-linear
5.67612	1.23192	11.5543	2.07078	non-linear
6.2272	1.07613	11.7832	2.48322	non-linear
8.54565	1.59568	12.6451	2.20321	non-linear
9.81261	1.50924	13.1824	2.64961	non-linear
10.3346	1.15759	14.7509	2.42121	non-linear
10.9785	1.1133	13.9076	2.44979	non-linear
11.2091	1.6682	14.5611	1.6957	non-linear
8.28574	1.59966	13.9709	2.15793	scattered
4.30842	1.04954	5.68124	2.35872	scattered
11.582	1.55076	2.74154	1.96831	scattered
0.330441	1.8991	2.29272	1.41759	scattered
6.81288	1.4431	11.9159	1.34669	scattered
9.52495	1.05123	10.0095	2.04652	scattered
5.05258	1.0147	5.65819	2.37821	scattered
10.0757	1.0583	12.5927	1.19319	scattered
6.20263	1.95639	2.62406	1.70101	scattered
11.5564	1.23913	9.33242	1.33046	scattered
1.99469	1.77795	12.8319	2.63231	scattered
10.2733	1.91695	10.1407	1.46819	scattered
3.5	1.31622	22.51	1.38485	inverse relationship
4.5	1.83618	20.61	2.59803	inverse relationship
5.5	1.4162	18.71	2.6485	inverse relationship
6.5	1.34804	16.81	2.05426	inverse relationship
7.5	1.27093	14.91	1.81416	inverse relationship
8.5	1.34223	13.01	1.54647	inverse relationship
9.5	1.9327	11.11	2.50616	inverse relationship
10.5	1.52553	9.21	2.37477	inverse relationship
11.5	1.60851	7.31	2.06827	inverse relationship
12.5	1.13226	5.41	2.2667	inverse relationship
13.5	1.06412	3.51	2.13646	inverse relationship
14.5	1.36213	1.61	2.64185	inverse relationship
