# Supplementary material for: The daughter–parent plot: a tool for analyzing thermochronological data
Source: Copernicus journal article supplement (doi:10.5194/gchron-6-429-2024), 2024-07-26
Supplement: Supplementary file [file gchron-6-429-2024-supplement-title-page.pdf › gchron-6-429-2024-supplement-title-page.pdf]

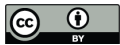

## *Supplement of*

# **The daughter–parent plot: a tool for analyzing thermochronological data**

**Birk Härtel and Eva Enkelmann**

*Correspondence to:* Birk Härtel ([birk.haertel@ucalgary.ca](mailto:birk.haertel@ucalgary.ca))

- [gchron-6-429-2024-supplement-title-page.pdf](#)
- [Table S1\\_Haertel\\_Enkelmann.xlsx](#)

The copyright of individual parts of the supplement might differ from the article licence.
